# Supplementary material for: Endodormancy Release Can Be Modulated by the GA4-GID1c-DELLA2 Module in Peach Leaf Buds
Source: Front Plant Sci. 2021 Sep 27;12:713514. doi: 10.3389/fpls.2021.713514 (PMC8504481; doi:10.3389/fpls.2021.713514)
Supplement: Supplementary file 1 [file Table_1.xlsx]

## Sheet: Sheet1
Gene	Primer	Application
RT-GID1C-F	GCTGGTGATAGCTCTGGTGG	qRT-PCR
RT-GID1C-R	GCTCTCCAATACCAGTCCCG	qRT-PCR
RT-GID1B-F	ACAGGCCCCTGAAAATGAGG	qRT-PCR
RT-GID1B-R	ACAAGACGGCGACAGAATGT	qRT-PCR
RT-DELLA2-F	TGCTTTCAAGCAGGCGAGTA	qRT-PCR
RT-DELLA2-R	GTTGGCTGTGGTTGCTTCAG	qRT-PCR
RT-DELLA1-F	GCTGAATGGCAAGGCCAAAA	qRT-PCR
RT-DELLA1-R	GAGCCCATGACCATCTCCAG	qRT-PCR
RT-CYP707A1-F	ACAGACCAACAGATTGCTGACAAC	qRT-PCR
RT-CYP707AA1-R	CCTTCATCATCACCCTCCTCTTCTT	qRT-PCR
RT-CYP707AA2-F	TCGGCAACAATAGGGACTTTGAAATG	qRT-PCR
RT-CYP707AA2-R	CCATCACTCTTCCTTCTCTTCGCTAT	qRT-PCR
RT-CYP707AA3-F	TCACCAAGGAGACTACCACAATAGC	qRT-PCR
RT-CYP707AA3-R	CAAGGAAGCCAACATCAAAGGAGAAC	qRT-PCR
RT-NCED1-F	GACTTCGCTATCACAGAACGGTATG	qRT-PCR
RT-NCED1-R	CAGAGATGGAAGCAGAAGCAATCG	qRT-PCR
RT-NCED2-F	GAAACCCAGAGACTCGTCCAAGA	qRT-PCR
RT-NCED2-R	AGCAGCCTGTCGTTGTGATAGA	qRT-PCR
PpUBQ-F	CGAACCCTAGCCGATTACAA	qRT-PCR
PpUBQ-R	AGTGGTTCGCCATGAAAGTC	qRT-PCR
PpActionF	GTTATTCTTCATCGGCGTCTTCG	qRT-PCR
PpActionR	CTTCACCATTCCAGTTCCATTGTC	qRT-PCR
AtActionF:	GCTCCTCTTAACCCAAAGGC	qRT-PCR
AtActionR:	CACACCATCACCAGAATCCAGC	qRT-PCR
