# Supplementary material for: Endodormancy Release Can Be Modulated by the GA4-GID1c-DELLA2 Module in Peach Leaf Buds
Source: Front Plant Sci. 2021 Sep 27;12:713514. doi: 10.3389/fpls.2021.713514 (PMC8504481; doi:10.3389/fpls.2021.713514)
Supplement: Supplementary file 4 [file Table_4.XLSX]

## Sheet: Sheet1
Arabidopsis thaliana	Arabidopsis thaliana_GID1a	AT3G05120	TAIR
	Arabidopsis thaliana_GID1c	AT5G27320
	Arabidopsis thaliana_GID1b	AT3G63010
Malus domestica	Malus domestica_GID1a-1	MDP0000319301	Phytozome
	Malus domestica_GID1a-2	MDP0000445131, ES790010
	Malus domestica_GID1b-1	MDP0000319522
	Malus domestica_GID1b-2	MDP0000929994
Prunus persica	Prunus_persica_GID1a	ppa018174m	Phytozome
	Prunus persica_GID1b-1	ppa008109m
Populus trichocarpa	Populus_trichocarpa_GID1a-1	Potri.005G040600.1/PtpAffx.29892.1.S1_s_at	Phytozome
	Populus_trichocarpa_GID1a-2	Potri.013G028700.1/PtpAffx.29892.1.S1_s_at
	Populus_trichocarpa_GID1b-1	Potri.002G213100.1
	Populus_trichocarpa_GID1b-2	Potri.014G135900.1
Vitis vinifera	Vitis vinifera_GID1a	GSVIVG01022014001	Phytozome
	Vitis vinifera_GID1b	GSVIVG01011037001
Oryza sativa	Oryza sativa_GID1	LOC_Os05g33730	TIGR	OsGID1
Zea mays	Zea mays_GID1-1	GRMZM2G173630_T01	Phyotozome
	Zea mays_GID1-2	GRMZM2G016605_T02
Solanum lycopersicum	Solanum_lycopersicum _GID1a	Solyc01g098390.2.1.sly.27300416/1	Phytozome
	Solanum_lycopersicum _GID1b-1	Solyc06g008870.2.1.sly.27283298/1
	Solanum_lycopersicum _GID1b-2	Solyc09g074270.2.1.sly.27309102/1
