# Supplementary material for: Endodormancy Release Can Be Modulated by the GA4-GID1c-DELLA2 Module in Peach Leaf Buds
Source: Front Plant Sci. 2021 Sep 27;12:713514. doi: 10.3389/fpls.2021.713514 (PMC8504481; doi:10.3389/fpls.2021.713514)
Supplement: Supplementary file 5 [file Table_5.XLSX]

## Sheet: Sheet1
Data	Bud break
2021-10-15	0	0	0
2021-10-30	0	0	0
2021-11-15	0	0	0
2021-12-01	0	0	0
2021-12-15	10.1184	9.69186	11.21
2021-12-25	25.7287	25.6522	25.7137
2021-01-09	68.0163	70.2428	71.7087
2021-01-24	88.8909	87.8971	88.0305
