# Supplementary material for: Endodormancy Release Can Be Modulated by the GA4-GID1c-DELLA2 Module in Peach Leaf Buds
Source: Front Plant Sci. 2021 Sep 27;12:713514. doi: 10.3389/fpls.2021.713514 (PMC8504481; doi:10.3389/fpls.2021.713514)
Supplement: Supplementary file 6 [file Table_6.xlsx]

## Sheet: Sheet1
Date	Test samples		GA4
	Dilution volume（mL）	Weigh（g）	Test concentration（ng/mL）	Sample content（ng/g）
2021-10-15	0.1	0.0754	0.0541	0.0717507
	0.1	0.0807	0.0904	0.11202
	0.1	0.0764	0.0865	0.11322
2021-10-30	0.2	0.4604	0.288	0.125109
	0.2	0.4504	0.27	0.119893
	0.2	0.4454	0.222	0.0996857
2021-11-15	0.2	0.322	0.104	0.0645963
	0.2	0.332	0.0904	0.0544578
	0.2	0.3447	0.106	0.0615028
1st-Dec	0.1	0.1646	0.857	0.520656
	0.1	0.1532	0.744	0.48564
	0.1	0.1443	0.747	0.517672
2021-12-15	0.2	0.6201	0.573	0.184809
	0.2	0.467	0.524	0.224411
	0.2	0.5553	0.525417	0.189237
2021-12-25	0.2	0.8594	0.43	0.10007
	0.2	0.7575	0.493	0.130165
	0.2	0.8281	0.446	0.107716
2021-01-09	0.2	0.3614	0.106	0.0586608
	0.2	0.3062	0.104	0.0679295
	0.2	0.3196	0.119167	0.0745724
2021-01-24	0.2	0.6575	0.287	0.0873004
	0.2	0.6888	0.304	0.0882695
	0.2	0.7362	0.347	0.0942679
