# Supplementary material for: Endodormancy Release Can Be Modulated by the GA4-GID1c-DELLA2 Module in Peach Leaf Buds
Source: Front Plant Sci. 2021 Sep 27;12:713514. doi: 10.3389/fpls.2021.713514 (PMC8504481; doi:10.3389/fpls.2021.713514)
Supplement: Supplementary file 7 [file Table_7.XLS]

## Sheet: Standard Curve_ Ct Results
	Samples	template (18S)Ct	Template Ct average	target gene Ct	Target gene Ct average	DCt=Target gene Ct average - Template Ct average	DDCt=Target geneCt-Template(18S)Ct-DCt	2-DDCt
	1	18.85	18.8267	18.58	18.5733	-0.253333	-0.0166667	1.01162	1.00007	0.0107417
		18.78		18.55			0.0233333	0.983957
		18.85		18.59			-0.00666667	1.00463
	2	22.83		22.32			-0.256667	1.19472	1.2151	0.0435743
		22.88		22.27			-0.356667	1.28046
		22.84		22.36			-0.226667	1.17013
	3	22.86		22.3567			-0.25	1.18921	1.17695	0.00817198
		22.865		22.3767			-0.235	1.17691
		22.87		22.3967			-0.22	1.16473
	4	22.875		22.4167			-0.205	1.15269	1.1408	0.00792102
		22.88		22.4367			-0.19	1.14076
		22.885		22.4567			-0.175	1.12896
	5	22.89		22.4767			-0.16	1.11729	1.10577	0.00767776
		22.895		22.4967			-0.145	1.10573
		22.9		22.5167			-0.13	1.09429
	6	22.905		22.5367			-0.115	1.08298	1.07181	0.00744197
		22.91		22.5567			-0.1	1.07177
		22.915		22.5767			-0.085	1.06069
	7	22.92		22.5967			-0.07	1.04972	1.0389	0.00721343
		22.925		22.6167			-0.055	1.03886
		22.93		22.6367			-0.04	1.02811
	8	22.935		22.6567			-0.025	1.01748	1.00699	0.0069919
		22.94		22.6767			-0.01	1.00696
		22.945		22.6967			0.005	0.99654
