# Supplementary material for: Endodormancy Release Can Be Modulated by the GA4-GID1c-DELLA2 Module in Peach Leaf Buds
Source: Front Plant Sci. 2021 Sep 27;12:713514. doi: 10.3389/fpls.2021.713514 (PMC8504481; doi:10.3389/fpls.2021.713514)
Supplement: Supplementary file 8 [file Table_8.XLS]

## Sheet: Standard Curve_ Ct Results
	Samples	template (18S)Ct	Template Ct average	target gene Ct	Target gene Ct average	DCt=Target gene Ct average - Template Ct average	DDCt=Target geneCt-Template(18S)Ct-DCt	2-DDCt
	1	18.85	18.8267	18.56	18.67	-0.156667	-0.133333	1.09682	1.00341	0.0708754
		18.78		18.78			0.156667	0.897095
		18.85		18.67			-0.0233333	1.0163
	2	22.83		23.72			1.04667	0.484085	0.470018	0.0143135
		22.88		23.88			1.15667	0.448548
		22.84		23.75			1.06667	0.477421
	3	19.02		19.23			0.366667	0.775572	0.775149	0.0376751
		19.07		19.39			0.476667	0.718636
		19.15		19.26			0.266667	0.831238
	4	20.5		20.52			0.176667	0.884745	0.830313	0.0362882
		20.54		20.67			0.286667	0.819794
		20.53		20.72			0.346667	0.786399
	5	19.66		19.65			0.146667	0.903335	0.775833	0.0884239
		19.69		19.89			0.356667	0.780967
		19.76		20.24			0.636667	0.643197
	6	18.45		19.8			1.50667	0.351923	0.390356	0.0429691
		18.4		19.7			1.45667	0.364334
		18.74		19.72			1.13667	0.454809
	7	20.17		21.26			1.24667	0.421421	0.462933	0.0372647
		20.24		21.24			1.15667	0.448548
		20.46		21.25			0.946667	0.51883
	8	19.2		20.32			1.27667	0.412748	0.352727	0.0400138
		19.2		20.67			1.62667	0.323836
		19.23		20.71			1.63667	0.321599
