# Supplementary material for: Endodormancy Release Can Be Modulated by the GA4-GID1c-DELLA2 Module in Peach Leaf Buds
Source: Front Plant Sci. 2021 Sep 27;12:713514. doi: 10.3389/fpls.2021.713514 (PMC8504481; doi:10.3389/fpls.2021.713514)
Supplement: Supplementary file 9 [file Table_9.xlsx]

## Sheet: Sheet1
Pearson correlation of GA4 content and PpGID1c-SPSS
Data			95% confidence interval of the difference		t	df	p<0.05
	Standard deviation	Standard error of the mean
			Lower limit	Upper limit
15-Oct	0.03498	0.0202	0.81417	0.98797	44.616	2	0.001
30-Oct	0.05228	0.03018	0.97034	1.23007	36.451	2	0.001
15-Nov	0.01184	0.00684	0.56259	0.62144	86.581	2	0
1-Dec	0.0849	0.04902	0.02753	0.44933	4.864	2	0.04
15-Dec	0.041	0.02367	0.33767	0.54138	18.567	2	0.003
25-Dec	0.05421	0.0313	0.1816	0.45091	10.105	2	0.01
9-Jan	0.0358	0.02067	0.30334	0.48122	18.977	2	0.003
24-Jan	0.016	0.00924	0.3037	0.38318	37.185	2	0.001
	p<0.05 indicates a significant correlation between GA4 and PpGID1c, p<0.01 indicates an extremely significant correlation
Single pearson correlation coefficient between GA4 content and PpGID1c expression series.
Data	GA4 content average	GID1c expression average	EXY(Covariance)	X-Standard deviation	Y-Standard deviation
15-Oct	0.0989968	1.00007	0.098981	0.00329513	0.0919722
30-Oct	0.114896	1.2151	0.0721396	0.00172259	0.268637
15-Nov	0.0601856	0.6522	0.15995	0.00925721	0.00198913
1-Dec	0.507989	0.746415	0.603178	0.123615	0.00246167
15-Dec	0.199486	0.639014	0.356972	0.00185638	0.0033392
25-Dec	0.11265	0.428904	0.391999	0.00191402	0.0717684
9-Jan	0.0670542	0.459333	0.289027	0.00798267	0.0563904
24-Jan	0.0899459	0.433388	0.352101	0.00441615	0.0693857
			2.32435	0.154059	0.565944
			0.290543	0.0192574	1.03992
			0.0160422	0.0164485
		P=0.016042248/0.016448459=0.975304009,close to 1, indicating that GA4 content is positively correlated with GID1c expression.
