# Supplementary material for: Endodormancy Release Can Be Modulated by the GA4-GID1c-DELLA2 Module in Peach Leaf Buds
Source: Front Plant Sci. 2021 Sep 27;12:713514. doi: 10.3389/fpls.2021.713514 (PMC8504481; doi:10.3389/fpls.2021.713514)
Supplement: Supplementary file 10 [file Table_10.XLSX]

## Sheet: A12
A01	SYBR	2	Unkn	A1	28.46
A02	SYBR	2	Unkn	A1	28.74						cyp707A1	A1	28.46	29.27	29.11				28.46	28.74	36.79	29.4	30.51	29.42	28.77	29.44	28.99	29.26	28.14	28.22
A03	SYBR	3	Unkn	A1	36.79							A1	28.74	29.16	28.93				29.27	29.16	38.03	29.77	31.19	29.98	28.47	29.72	29.52	29.58	28.28	28.37
A04	SYBR	4	Unkn	A1	29.4							A1	36.79	38.03	N/A				29.11	28.93	N/A	29.55	30.69	29.88	28.1	29.97	29.16	29.22	28.22	28.19
A05	SYBR	5	Unkn	A1	30.51							A1	29.4	29.77	29.55
A06	SYBR	6	Unkn	A1	29.42							A1	30.51	31.19	30.69
A07	SYBR	7	Unkn	A1	28.77							A1	29.42	29.98	29.88
A08	SYBR	8	Unkn	A1	29.44							A1	28.77	28.47	28.1
A09	SYBR	1	Unkn	A1	28.99							A1	29.44	29.72	29.97
A10	SYBR	1	Unkn	A1	29.26							A1	28.99	29.52	29.16
A11	SYBR	1	Unkn	A1	28.14							A1	29.26	29.58	29.22
A12	SYBR	1	Unkn	A1	28.22							A1	28.14	28.28	28.22
B01	SYBR	2	Unkn	A1	29.27							A1	28.22	28.37	28.19
B02	SYBR	2	Unkn	A1	29.16
B03	SYBR	3	Unkn	A1	38.03
B04	SYBR	4	Unkn	A1	29.77							A2	27.25	27.2	27.23				27.25	27.87	30.66	28.5	29.06	28.22	27.41	28.84	27.87	27.93	27.84	26.74
B05	SYBR	5	Unkn	A1	31.19							A2	27.87	27.59	27.77				27.2	27.59	30.77	28.4	28.56	28.13	27.45	28.08	27.72	27.8	27.7	26.69
B06	SYBR	6	Unkn	A1	29.98							A2	30.66	30.77	30.99				27.23	27.77	30.99	28.5	28.73	28.26	27.57	29.01	27.88	27.97	27.94	26.69
B07	SYBR	7	Unkn	A1	28.47							A2	28.5	28.4	28.5
B08	SYBR	8	Unkn	A1	29.72							A2	29.06	28.56	28.73
B09	SYBR	2	Unkn	A1	29.52							A2	28.22	28.13	28.26
B10	SYBR	2	Unkn	A1	29.58							A2	27.41	27.45	27.57
B11	SYBR	2	Unkn	A1	28.28							A2	28.84	28.08	29.01
B12	SYBR	2	Unkn	A1	28.37							A2	27.87	27.72	27.88
C01	SYBR	2	Unkn	A1	29.11							A2	27.93	27.8	27.97
C02	SYBR	2	Unkn	A1	28.93							A2	27.84	27.7	27.94
C03	SYBR	3	Unkn	A1	N/A							A2	26.74	26.69	26.69
C04	SYBR	4	Unkn	A1	29.55
C05	SYBR	5	Unkn	A1	30.69
C06	SYBR	6	Unkn	A1	29.88							UBQ	20.52	20.79	20.65				20.52		33.42	21.01	21.1	20.75	20.3	20.64	20.09	20.93	20.56	20.76
C07	SYBR	7	Unkn	A1	28.1							UBQ	20.32	20.72	20.52				20.79		34.36	21.11	21.39	20.97	20.37	20.95	20.26	21.14	20.77	21.44
C08	SYBR	8	Unkn	A1	29.97							UBQ	33.42	34.36					20.65			21.06	21.25	20.85	20.33	20.8	20.16	21	20.66	21
C09	SYBR	3	Unkn	A1	29.16							UBQ	21.01	21.11	21.06
C10	SYBR	3	Unkn	A1	29.22							UBQ	21.1	21.39	21.25
C11	SYBR	3	Unkn	A1	28.22							UBQ	20.75	20.97	20.85
C12	SYBR	3	Unkn	A1	28.19							UBQ	20.3	20.37	20.33
D01	SYBR	2	Unkn	A2	27.25							UBQ	20.64	20.95	20.8
D02	SYBR	2	Unkn	A2	27.87							UBQ	20.09	20.26	20.16
D03	SYBR	3	Unkn	A2	30.66							UBQ	20.93	21.14	21
D04	SYBR	4	Unkn	A2	28.5							UBQ	20.56	20.77	20.66
D05	SYBR	5	Unkn	A2	29.06							UBQ	20.76	21.44	21
D06	SYBR	6	Unkn	A2	28.22
D07	SYBR	7	Unkn	A2	27.41
D08	SYBR	8	Unkn	A2	28.84
D09	SYBR	4	Unkn	A2	27.87
D10	SYBR	4	Unkn	A2	27.93
D11	SYBR	4	Unkn	A2	27.84
D12	SYBR	4	Unkn	A2	26.74
E01	SYBR	2	Unkn	A2	27.2
E02	SYBR	2	Unkn	A2	27.59
E03	SYBR	3	Unkn	A2	30.77
E04	SYBR	4	Unkn	A2	28.4
E05	SYBR	5	Unkn	A2	28.56
E06	SYBR	6	Unkn	A2	28.13
E07	SYBR	7	Unkn	A2	27.45
E08	SYBR	8	Unkn	A2	28.08
E09	SYBR	5	Unkn	A2	27.72
E10	SYBR	5	Unkn	A2	27.8
E11	SYBR	5	Unkn	A2	27.7
E12	SYBR	5	Unkn	A2	26.69
F01	SYBR	2	Unkn	A2	27.23
F02	SYBR	2	Unkn	A2	27.77
F03	SYBR	3	Unkn	A2	30.99
F04	SYBR	4	Unkn	A2	28.5
F05	SYBR	5	Unkn	A2	28.73
F06	SYBR	6	Unkn	A2	28.26
F07	SYBR	7	Unkn	A2	27.57
F08	SYBR	8	Unkn	A2	29.01
F09	SYBR	6	Unkn	A2	27.88
F10	SYBR	6	Unkn	A2	27.97
F11	SYBR	6	Unkn	A2	27.94
F12	SYBR	6	Unkn	A2	26.69
G01	SYBR	2	Unkn	UBQ	20.52
G02	SYBR	2	Unkn	UBQ	20.32
G03	SYBR	3	Unkn	UBQ	33.42
G04	SYBR	4	Unkn	UBQ	21.01
G05	SYBR	5	Unkn	UBQ	21.1
G06	SYBR	6	Unkn	UBQ	20.75
G07	SYBR	7	Unkn	UBQ	20.3
G08	SYBR	8	Unkn	UBQ	20.64
G09	SYBR	7	Unkn	UBQ	20.09
G10	SYBR	7	Unkn	UBQ	20.93
G11	SYBR	7	Unkn	UBQ	20.56
G12	SYBR	7	Unkn	UBQ	20.76
H01	SYBR	2	Unkn	UBQ	20.79
H02	SYBR	2	Unkn	UBQ	20.72
H03	SYBR	3	Unkn	UBQ	34.36
H04	SYBR	4	Unkn	UBQ	21.11
H05	SYBR	5	Unkn	UBQ	21.39
H06	SYBR	6	Unkn	UBQ	20.97
H07	SYBR	7	Unkn	UBQ	20.37
H08	SYBR	8	Unkn	UBQ	20.95
H09	SYBR	8	Unkn	UBQ	20.26
H10	SYBR	8	Unkn	UBQ	21.14
H11	SYBR	8	Unkn	UBQ	20.77
H12	SYBR	8	Unkn	UBQ	21.44

## Sheet: DELLA1 2
	A01	SYBR	2	Unkn	DELLA1	24.13				DELLA1	24.13	23.88	N/A								24.13	23.68	34.98	24.72	24.76	24.05	23.01	23.49	23.41	24.28	23.71	24.04
	A02	SYBR	2	Unkn	DELLA1	23.68				DELLA1	23.68	24.13	23.8								23.88	24.13	34.85	24.69	24.75	24.43	24.08	23.79	23.58	24.34	24.32	24.56
	A03	SYBR	3	Unkn	DELLA1	34.98				DELLA1	34.98	34.85	35.03								24	23.8	35.03	24.43	24.97	24.07	23.16	23.69	23.4	24.19	24.16	24.23
	A04	SYBR	4	Unkn	DELLA1	24.72				DELLA1	24.72	24.69	24.43
	A05	SYBR	5	Unkn	DELLA1	24.76				DELLA1	24.76	24.75	24.97
	A06	SYBR	6	Unkn	DELLA1	24.05				DELLA1	24.05	24.43	24.07
	A07	SYBR	7	Unkn	DELLA1	23.01				DELLA1	23.01	24.08	23.16
	A08	SYBR	8	Unkn	DELLA1	23.49				DELLA1	23.49	23.79	23.69
	A09	SYBR	1	Unkn	DELLA1	23.41				DELLA1	23.41	23.58	23.4
	A10	SYBR	1	Unkn	DELLA1	24.28				DELLA1	24.28	24.34	24.19
	A11	SYBR	1	Unkn	DELLA1	23.71				DELLA1	23.71	24.32	24.16
	A12	SYBR	1	Unkn	DELLA1	24.04				DELLA1	24.04	24.56	24.23
	B01	SYBR	2	Unkn	DELLA1	23.88
	B02	SYBR	2	Unkn	DELLA1	24.13
	B03	SYBR	3	Unkn	DELLA1	34.85				DELLA2	24.12	24.06	24.01								24.12	24.12	31.41	24.87	24.9	24.41	23.47	23.81	23.47	24.91	24.6	24.55
	B04	SYBR	4	Unkn	DELLA1	24.69				DELLA2	24.12	24.01	24.06								24.06	24.01	31.48	24.83	24.58	24.37	23.35	23.72	24.89	24.3	24.46	24.25
	B05	SYBR	5	Unkn	DELLA1	24.75				DELLA2	31.41	31.48	31.64								24.01	24.06	31.64	25.02	24.86	24.4	23.7	24.06	23.62	24.72	24.25	24.59
	B06	SYBR	6	Unkn	DELLA1	24.43				DELLA2	24.87	24.83	25.02
	B07	SYBR	7	Unkn	DELLA1	24.08				DELLA2	24.9	24.58	24.86
	B08	SYBR	8	Unkn	DELLA1	23.79				DELLA2	24.41	24.37	24.4
	B09	SYBR	2	Unkn	DELLA1	23.58				DELLA2	23.47	23.35	23.7
	B10	SYBR	2	Unkn	DELLA1	24.34				DELLA2	23.81	23.72	24.06
	B11	SYBR	2	Unkn	DELLA1	24.32				DELLA2	23.47	24.89	23.62
	B12	SYBR	2	Unkn	DELLA1	24.56				DELLA2	24.91	24.3	24.72
	C01	SYBR	2	Unkn	DELLA1	N/A				DELLA2	24.6	24.46	24.25
	C02	SYBR	2	Unkn	DELLA1	23.8				DELLA2	24.55	24.25	24.59
	C03	SYBR	3	Unkn	DELLA1	35.03
	C04	SYBR	4	Unkn	DELLA1	24.43
	C05	SYBR	5	Unkn	DELLA1	24.97
	C06	SYBR	6	Unkn	DELLA1	24.07				UBQ	20.21	20.35	20.3								20.21	19.73	30.15	21.06	20.8	20.64	19.61	20.25	19.73	20.26	20.22	20.26
	C07	SYBR	7	Unkn	DELLA1	23.16				UBQ	19.73	19.81	19.77								20.35	19.81	32.64	21.11	20.99	20.7	19.96	20.54	19.66	20.35	20.26	20.21
	C08	SYBR	8	Unkn	DELLA1	23.69				UBQ	30.15	32.64									20.3	19.77		21.08	20.9	20.67	19.8	20.4	19.7	20.3	20.24	20.25
	C09	SYBR	3	Unkn	DELLA1	23.4				UBQ	21.06	21.11	21.08
	C10	SYBR	3	Unkn	DELLA1	24.19				UBQ	20.8	20.99	20.9
	C11	SYBR	3	Unkn	DELLA1	24.16				UBQ	20.64	20.7	20.67
	C12	SYBR	3	Unkn	DELLA1	24.23				UBQ	19.61	19.96	19.8
	D01	SYBR	2	Unkn	DELLA2	24.12				UBQ	20.25	20.54	20.4
	D02	SYBR	2	Unkn	DELLA2	24.12				UBQ	19.73	19.66	19.7
	D03	SYBR	3	Unkn	DELLA2	31.41				UBQ	20.26	20.35	20.3
	D04	SYBR	4	Unkn	DELLA2	24.87				UBQ	20.22	20.26	20.24
	D05	SYBR	5	Unkn	DELLA2	24.9				UBQ	20.26	20.21	20.25
	D06	SYBR	6	Unkn	DELLA2	24.41
	D07	SYBR	7	Unkn	DELLA2	23.47
	D08	SYBR	8	Unkn	DELLA2	23.81
	D09	SYBR	4	Unkn	DELLA2	23.47
	D10	SYBR	4	Unkn	DELLA2	24.91
	D11	SYBR	4	Unkn	DELLA2	24.6
	D12	SYBR	4	Unkn	DELLA2	24.55
	E01	SYBR	2	Unkn	DELLA2	24.06
	E02	SYBR	2	Unkn	DELLA2	24.01
	E03	SYBR	3	Unkn	DELLA2	31.48
	E04	SYBR	4	Unkn	DELLA2	24.83
	E05	SYBR	5	Unkn	DELLA2	24.58
	E06	SYBR	6	Unkn	DELLA2	24.37
	E07	SYBR	7	Unkn	DELLA2	23.35
	E08	SYBR	8	Unkn	DELLA2	23.72
	E09	SYBR	5	Unkn	DELLA2	24.89
	E10	SYBR	5	Unkn	DELLA2	24.3
	E11	SYBR	5	Unkn	DELLA2	24.46
	E12	SYBR	5	Unkn	DELLA2	24.25
	F01	SYBR	2	Unkn	DELLA2	24.01
	F02	SYBR	2	Unkn	DELLA2	24.06
	F03	SYBR	3	Unkn	DELLA2	31.64
	F04	SYBR	4	Unkn	DELLA2	25.02
	F05	SYBR	5	Unkn	DELLA2	24.86
	F06	SYBR	6	Unkn	DELLA2	24.4
	F07	SYBR	7	Unkn	DELLA2	23.7
	F08	SYBR	8	Unkn	DELLA2	24.06
	F09	SYBR	6	Unkn	DELLA2	23.62
	F10	SYBR	6	Unkn	DELLA2	24.72
	F11	SYBR	6	Unkn	DELLA2	24.25
	F12	SYBR	6	Unkn	DELLA2	24.59
	G01	SYBR	2	Unkn	UBQ	20.21
	G02	SYBR	2	Unkn	UBQ	19.73
	G03	SYBR	3	Unkn	UBQ	30.15
	G04	SYBR	4	Unkn	UBQ	21.06
	G05	SYBR	5	Unkn	UBQ	20.8
	G06	SYBR	6	Unkn	UBQ	20.64
	G07	SYBR	7	Unkn	UBQ	19.61
	G08	SYBR	8	Unkn	UBQ	20.25
	G09	SYBR	7	Unkn	UBQ	19.73
	G10	SYBR	7	Unkn	UBQ	20.26
	G11	SYBR	7	Unkn	UBQ	20.22
	G12	SYBR	7	Unkn	UBQ	20.26
	H01	SYBR	2	Unkn	UBQ	20.35
	H02	SYBR	2	Unkn	UBQ	19.81
	H03	SYBR	3	Unkn	UBQ	32.64
	H04	SYBR	4	Unkn	UBQ	21.11
	H05	SYBR	5	Unkn	UBQ	20.99
	H06	SYBR	6	Unkn	UBQ	20.7
	H07	SYBR	7	Unkn	UBQ	19.96
	H08	SYBR	8	Unkn	UBQ	20.54
	H09	SYBR	8	Unkn	UBQ	19.66
	H10	SYBR	8	Unkn	UBQ	20.35
	H11	SYBR	8	Unkn	UBQ	20.26
	H12	SYBR	8	Unkn	UBQ	20.21

## Sheet: GID1B C
	A01	SYBR	2	Unkn	GID1B	20.53				GID1B	20.53	21.09	21.26	20.53	20.53	20.7	35.49	20.87	21.38	20.58	20.38	20.54	20.08	21.05	20.71	20.04
	A02	SYBR	2	Unkn	GID1B	20.7				GID1B	20.7	21.02	20.58	21.09	21.09	21.02	32.25	21.46	21.84	20.87	20.88	20.95	20.84	21.24	21.67	20.23
	A03	SYBR	3	Unkn	GID1B	35.49				GID1B	35.49	32.25	32.05	21.26	21.26	20.58	32.05	21.09	21.9	20.87	20.77	20.77	20.98	21.27	21.23	20.26
	A04	SYBR	4	Unkn	GID1B	20.87				GID1B	20.87	21.46	21.09	20.7
	A05	SYBR	5	Unkn	GA4 6	21.38				GA4 6	21.38	21.84	21.9	21.02
	A06	SYBR	6	Unkn	GA4 12	20.58				GA4 12	20.58	20.87	20.87	20.58
	A07	SYBR	7	Unkn	GA4 24	20.38				GA4 24	20.38	20.88	20.77	20.87
	A08	SYBR	8	Unkn	GA4 48	20.54				GA4 48	20.54	20.95	20.77	21.46
	A09	SYBR	1	Unkn	ABA 6	20.08				ABA 6	20.08	20.84	20.98	21.09
	A10	SYBR	1	Unkn	ABA 12	21.05				ABA 12	21.05	21.24	21.27	21.38
	A11	SYBR	1	Unkn	ABA 24	20.71				ABA 24	20.71	21.67	21.23	21.84
	A12	SYBR	1	Unkn	ABA 48	20.04				ABA 48	20.04	20.23	20.26	21.9
	B01	SYBR	2	Unkn	GID1B	21.09								20.58
	B02	SYBR	2	Unkn	GID1B	21.02								20.87
	B03	SYBR	3	Unkn	GID1B	32.25								20.87
	B04	SYBR	4	Unkn	GID1B	21.46				gid1c	21.56	21.54	21.65	20.38	21.56
	B05	SYBR	5	Unkn	GA4 6	21.84				gid1c	21.22	21.05	21.29	20.88	21.54
	B06	SYBR	6	Unkn	GA4 12	20.87				gid1c	31.54	31.52	31.7	20.77	21.65
	B07	SYBR	7	Unkn	GA4 24	20.88				gid1c	21.4	21.3	22.13	20.54	21.22
	B08	SYBR	8	Unkn	GA4 48	20.95				GA4 6	21.38	21.32	21.53	20.95	21.05
	B09	SYBR	2	Unkn	ABA 6	20.84				GA4 12	21.18	21.16	21.2	20.77	21.29
	B10	SYBR	2	Unkn	ABA 12	21.24				GA4 24	21.32	21.09	21.3	20.08	21.4
	B11	SYBR	2	Unkn	ABA 24	21.67				GA4 48	21.11	21.3	21.71	20.84	21.3
	B12	SYBR	2	Unkn	ABA 48	20.23				ABA 6	20.7	20.77	21.11	20.98	22.13
	C01	SYBR	2	Unkn	GID1B	21.26				ABA 12	21.47	21.6	21.8	21.05	21.38
	C02	SYBR	2	Unkn	GID1B	20.58				ABA 24	21.8	21.51	21.57	21.24	21.32
	C03	SYBR	3	Unkn	GID1B	32.05				ABA 48	21.14	21.15	21.26	21.27	21.53
	C04	SYBR	4	Unkn	GID1B	21.09								20.71	21.18
	C05	SYBR	5	Unkn	GA4 6	21.9								21.67	21.16
	C06	SYBR	6	Unkn	GA4 12	20.87								21.23	21.2
	C07	SYBR	7	Unkn	GA4 24	20.77				UBQ	20.89	21.24	21	20.04	21.32	20.89		33.55			20.74	20.33	20.7	20.49	21.32	20.69	20.47
	C08	SYBR	8	Unkn	GA4 48	20.77				UBQ	20.63	20.97	20.8	20.23	21.09	21.24		32.38			21.5	20.69	21.01	20.49	21.39	20.89	20.55
	C09	SYBR	3	Unkn	ABA 6	20.98				UBQ	33.55	32.38		20.26	21.3	21					21	20.5	21.9	20.5	21.35	20.79	20.5
	C10	SYBR	3	Unkn	ABA 12	21.27				UBQ	21.07	21.44	21.2		21.11	20.63
	C11	SYBR	3	Unkn	ABA 24	21.23				GA4 6	21.05	21.06	21.05		21.3	20.97
	C12	SYBR	3	Unkn	ABA 48	20.26				GA4 12	20.74	21.5	21		21.71	20.8
	D01	SYBR	2	Unkn	gid1c	21.56				GA4 24	20.33	20.69	20.5		20.7	21.07
	D02	SYBR	2	Unkn	gid1c	21.22				GA4 48	20.7	21.01	20.9		20.77	21.44
	D03	SYBR	3	Unkn	gid1c	31.54				ABA 6	20.49	20.49	20.5		21.11	21.2
	D04	SYBR	4	Unkn	gid1c	21.4				ABA 12	21.32	21.39	21.35		21.47	21.05
	D05	SYBR	5	Unkn	GA4 6	21.38				ABA 24	20.69	20.89	20.79		21.6	21.06
	D06	SYBR	6	Unkn	GA4 12	21.18				ABA 48	20.47	20.55	20.5		21.8	21.05
	D07	SYBR	7	Unkn	GA4 24	21.32									21.8	20.74
	D08	SYBR	8	Unkn	GA4 48	21.11									21.51	21.5
	D09	SYBR	4	Unkn	ABA 6	20.7									21.57	21
	D10	SYBR	4	Unkn	ABA 12	21.47									21.14	20.33
	D11	SYBR	4	Unkn	ABA 24	21.8									21.15	20.69
	D12	SYBR	4	Unkn	ABA 48	21.14									21.26	20.5
	E01	SYBR	2	Unkn	gid1c	21.54										20.7
	E02	SYBR	2	Unkn	gid1c	21.05										21.01
	E03	SYBR	3	Unkn	gid1c	31.52										21.9
	E04	SYBR	4	Unkn	gid1c	21.3										20.49
	E05	SYBR	5	Unkn	GA4 6	21.32										20.49
	E06	SYBR	6	Unkn	GA4 12	21.16										20.5
	E07	SYBR	7	Unkn	GA4 24	21.09										21.32
	E08	SYBR	8	Unkn	GA4 48	21.3										21.39
	E09	SYBR	5	Unkn	ABA 6	20.77										21.35
	E10	SYBR	5	Unkn	ABA 12	21.6										20.69
	E11	SYBR	5	Unkn	ABA 24	21.51										20.89
	E12	SYBR	5	Unkn	ABA 48	21.15										20.79
	F01	SYBR	2	Unkn	gid1c	21.65										20.47
	F02	SYBR	2	Unkn	gid1c	21.29										20.55
	F03	SYBR	3	Unkn	gid1c	31.7										20.5
	F04	SYBR	4	Unkn	gid1c	22.13
	F05	SYBR	5	Unkn	GA4 6	21.53
	F06	SYBR	6	Unkn	GA4 12	21.2
	F07	SYBR	7	Unkn	GA4 24	21.3
	F08	SYBR	8	Unkn	GA4 48	21.71
	F09	SYBR	6	Unkn	ABA 6	21.11
	F10	SYBR	6	Unkn	ABA 12	21.8
	F11	SYBR	6	Unkn	ABA 24	21.57
	F12	SYBR	6	Unkn	ABA 48	21.26
	G01	SYBR	2	Unkn	UBQ	20.89
	G02	SYBR	2	Unkn	UBQ	20.63
	G03	SYBR	3	Unkn	UBQ	33.55
	G04	SYBR	4	Unkn	UBQ	21.07
	G05	SYBR	5	Unkn	GA4 6	21.05
	G06	SYBR	6	Unkn	GA4 12	20.74
	G07	SYBR	7	Unkn	GA4 24	20.33
	G08	SYBR	8	Unkn	GA4 48	20.7
	G09	SYBR	7	Unkn	ABA 6	20.49
	G10	SYBR	7	Unkn	ABA 12	21.32
	G11	SYBR	7	Unkn	ABA 24	20.69
	G12	SYBR	7	Unkn	ABA 48	20.47
	H01	SYBR	2	Unkn	UBQ	21.24
	H02	SYBR	2	Unkn	UBQ	20.97
	H03	SYBR	3	Unkn	UBQ	32.38
	H04	SYBR	4	Unkn	UBQ	21.44
	H05	SYBR	5	Unkn	GA4 6	21.06
	H06	SYBR	6	Unkn	GA4 12	21.5
	H07	SYBR	7	Unkn	GA4 24	20.69
	H08	SYBR	8	Unkn	GA4 48	21.01
	H09	SYBR	8	Unkn	ABA 6	20.49
	H10	SYBR	8	Unkn	ABA 12	21.39
	H11	SYBR	8	Unkn	ABA 24	20.89
	H12	SYBR	8	Unkn	ABA 48	20.55

## Sheet: NCED1 2
	A01	SYBR	2	Unkn	NCED1	27.43					NCED1	27.43	27.76	27.42		27.43
	A02	SYBR	2	Unkn	NCED1	27.38					NCED1	27.38	27.56	27.42		27.76					27.43	27.38	32.98	28.34	28.87	27.48	28.01	26.8	27.64	27.54	27.58	27.6
	A03	SYBR	3	Unkn	NCED1	32.98					NCED1	32.98	33.14	33.58		27.42					27.76	27.56	33.14	28.7	29.09	28.08	28.09	26.71	27.55	27.85	27.96	27.53
	A04	SYBR	4	Unkn	NCED1	28.34					NCED1	28.34	28.7	28.42		27.38					27.42	27.42	33.58	28.42	29.31	27.76	27.88	26.96	27.69	27.59	28.01	27.73
	A05	SYBR	5	Unkn	NCED1	28.87					NCED1	28.87	29.09	29.31		27.56
	A06	SYBR	6	Unkn	NCED1	27.48					NCED1	27.48	28.08	27.76		27.42
	A07	SYBR	7	Unkn	NCED1	28.01					NCED1	28.01	28.09	27.88		28.34
	A08	SYBR	8	Unkn	NCED1	26.8					NCED1	26.8	26.71	26.96		28.7
	A09	SYBR	1	Unkn	NCED1	27.64					NCED1	27.64	27.55	27.69		28.42
	A10	SYBR	1	Unkn	NCED1	27.54					NCED1	27.54	27.85	27.59		28.87
	A11	SYBR	1	Unkn	NCED1	27.58					NCED1	27.58	27.96	28.01		29.09
	A12	SYBR	1	Unkn	NCED1	27.6					NCED1	27.6	27.53	27.73		29.31
	B01	SYBR	2	Unkn	NCED1	27.76										27.48
	B02	SYBR	2	Unkn	NCED1	27.56										28.08
	B03	SYBR	3	Unkn	NCED1	33.14					NCED2	27.56	27.29	27.43		27.76		27.56			27.56	27.62	32.13	28.89	27.85	27.45	27.73	29.52	27.89	26.97	28.74	29.47
	B04	SYBR	4	Unkn	NCED1	28.7					NCED2	27.62	27.55	27.68		28.01		27.29			27.29	27.55	32.09	28.93	27.94	27.39	27.45	29.26	27.93	27.01	28.56	29.38
	B05	SYBR	5	Unkn	NCED1	29.09					NCED2	32.13	32.09	32.29		28.09		27.43			27.43	27.68	32.29	28.97	28	27.38	27.79	29.67	28.07	26.66	28.37	29.52
	B06	SYBR	6	Unkn	NCED1	28.08					NCED2	28.89	28.93	28.97		27.88		27.62
	B07	SYBR	7	Unkn	NCED1	28.09					NCED2	27.85	27.94	28		26.8		27.55
	B08	SYBR	8	Unkn	NCED1	26.71					NCED2	27.45	27.39	27.38		26.71		27.68
	B09	SYBR	2	Unkn	NCED1	27.55					NCED2	27.73	27.45	27.79		26.96		28.89
	B10	SYBR	2	Unkn	NCED1	27.85					NCED2	29.52	29.26	29.67		27.64		28.93
	B11	SYBR	2	Unkn	NCED1	27.96					NCED2	27.89	27.93	28.07		27.55		28.97
	B12	SYBR	2	Unkn	NCED1	27.53					NCED2	26.97	27.01	26.66		27.69		27.85
	C01	SYBR	2	Unkn	NCED1	27.42					NCED2	28.74	28.56	28.37		27.54		27.94
	C02	SYBR	2	Unkn	NCED1	27.42					NCED2	29.47	29.38	29.52		27.85		28
	C03	SYBR	3	Unkn	NCED1	33.58										27.59		27.45
	C04	SYBR	4	Unkn	NCED1	28.42										27.58		27.39
	C05	SYBR	5	Unkn	NCED1	29.31					UBQ	20.46	20.57	20.5		27.96		27.38			20.46	20.01	29.66	21.04	20.43	20.55	19.96	20.76	19.83	20.21	20.76	21.06
	C06	SYBR	6	Unkn	NCED1	27.76					UBQ	20.01	20.3	20.2		28.01		27.73			20.57	20.3	31.84	21.25	20.48	20.77	20.16	21.08	19.97	20.37	21	21.27
	C07	SYBR	7	Unkn	NCED1	27.88					UBQ	29.66	31.84			27.6		27.45			20.5	20.2		21.1	20.45	20.66	20.05	21.4	19.9	20.3	20.9	21.15
	C08	SYBR	8	Unkn	NCED1	26.96					UBQ	21.04	21.25	21.1		27.53		27.79			20.01
	C09	SYBR	3	Unkn	NCED1	27.69					UBQ	20.43	20.48	20.45		27.73		29.52			20.3
	C10	SYBR	3	Unkn	NCED1	27.59					UBQ	20.55	20.77	20.66				29.26			20.2
	C11	SYBR	3	Unkn	NCED1	28.01					UBQ	19.96	20.16	20.05				29.67			21.04
	C12	SYBR	3	Unkn	NCED1	27.73					UBQ	20.76	21.08	21.4				27.89			21.25
	D01	SYBR	2	Unkn	NCED2	27.56					UBQ	19.83	19.97	19.9				27.93			21.1
	D02	SYBR	2	Unkn	NCED2	27.62					UBQ	20.21	20.37	20.3				28.07			20.43
	D03	SYBR	3	Unkn	NCED2	32.13					UBQ	20.76	21	20.9				26.97			20.48
	D04	SYBR	4	Unkn	NCED2	28.89					UBQ	21.06	21.27	21.15				27.01			20.45
	D05	SYBR	5	Unkn	NCED2	27.85												26.66			20.55
	D06	SYBR	6	Unkn	NCED2	27.45												28.74			20.77
	D07	SYBR	7	Unkn	NCED2	27.73												28.56			20.66
	D08	SYBR	8	Unkn	NCED2	29.52												28.37			19.96
	D09	SYBR	4	Unkn	NCED2	27.89												29.47			20.16
	D10	SYBR	4	Unkn	NCED2	26.97												29.38			20.05
	D11	SYBR	4	Unkn	NCED2	28.74												29.52			20.76
	D12	SYBR	4	Unkn	NCED2	29.47															21.08
	E01	SYBR	2	Unkn	NCED2	27.29															21.4
	E02	SYBR	2	Unkn	NCED2	27.55															19.83
	E03	SYBR	3	Unkn	NCED2	32.09															19.97
	E04	SYBR	4	Unkn	NCED2	28.93															19.9
	E05	SYBR	5	Unkn	NCED2	27.94															20.21
	E06	SYBR	6	Unkn	NCED2	27.39															20.37
	E07	SYBR	7	Unkn	NCED2	27.45															20.3
	E08	SYBR	8	Unkn	NCED2	29.26															20.76
	E09	SYBR	5	Unkn	NCED2	27.93															21
	E10	SYBR	5	Unkn	NCED2	27.01															20.9
	E11	SYBR	5	Unkn	NCED2	28.56															21.06
	E12	SYBR	5	Unkn	NCED2	29.38															21.27
	F01	SYBR	2	Unkn	NCED2	27.43															21.15
	F02	SYBR	2	Unkn	NCED2	27.68
	F03	SYBR	3	Unkn	NCED2	32.29
	F04	SYBR	4	Unkn	NCED2	28.97
	F05	SYBR	5	Unkn	NCED2	28
	F06	SYBR	6	Unkn	NCED2	27.38
	F07	SYBR	7	Unkn	NCED2	27.79
	F08	SYBR	8	Unkn	NCED2	29.67
	F09	SYBR	6	Unkn	NCED2	28.07
	F10	SYBR	6	Unkn	NCED2	26.66
	F11	SYBR	6	Unkn	NCED2	28.37
	F12	SYBR	6	Unkn	NCED2	29.52
	G01	SYBR	2	Unkn	UBQ	20.46
	G02	SYBR	2	Unkn	UBQ	20.01
	G03	SYBR	3	Unkn	UBQ	29.66
	G04	SYBR	4	Unkn	UBQ	21.04
	G05	SYBR	5	Unkn	UBQ	20.43
	G06	SYBR	6	Unkn	UBQ	20.55
	G07	SYBR	7	Unkn	UBQ	19.96
	G08	SYBR	8	Unkn	UBQ	20.76
	G09	SYBR	7	Unkn	UBQ	19.83
	G10	SYBR	7	Unkn	UBQ	20.21
	G11	SYBR	7	Unkn	UBQ	20.76
	G12	SYBR	7	Unkn	UBQ	21.06
	H01	SYBR	2	Unkn	UBQ	20.57
	H02	SYBR	2	Unkn	UBQ	20.3
	H03	SYBR	3	Unkn	UBQ	31.84
	H04	SYBR	4	Unkn	UBQ	21.25
	H05	SYBR	5	Unkn	UBQ	20.48
	H06	SYBR	6	Unkn	UBQ	20.77
	H07	SYBR	7	Unkn	UBQ	20.16
	H08	SYBR	8	Unkn	UBQ	21.08
	H09	SYBR	8	Unkn	UBQ	19.97
	H10	SYBR	8	Unkn	UBQ	20.37
	H11	SYBR	8	Unkn	UBQ	21
	H12	SYBR	8	Unkn	UBQ	21.27

## Sheet: a3 3-1
	Well	Fluor	Target	content	Sample	Cq
	A01	SYBR	2	Unkn	A3	29.65				A3	29.65	29.64	29.61
	A02	SYBR	2	Unkn	A3	29.1				A3	29.1	29.49	29.29		29.65	29.1	37.36	29.07	29.69	28.22	28.66	29.11	28.17	29	28.51	29.13
	A03	SYBR	3	Unkn	A3	37.36				A3	37.36	38.95	39.23		29.64	29.49	38.95	29.23	29.98	28.44	29.07	29.31	28.42	29.34	28.45	29.28
	A04	SYBR	4	Unkn	A3	29.07				A3	29.07	29.23	29.03		29.61	29.29	39.23	29.03	30.43	27.69	29.08	29.09	28.45	29.07	28.63	29.44
	A05	SYBR	5	Unkn	A3	29.69				A3	29.69	29.98	30.43
	A06	SYBR	6	Unkn	A3	28.22				A3	28.22	28.44	27.69
	A07	SYBR	7	Unkn	A3	28.66				A3	28.66	29.07	29.08
	A08	SYBR	8	Unkn	A3	29.11				A3	29.11	29.31	29.09
	A09	SYBR	1	Unkn	A3	28.17				A3	28.17	28.42	28.45
	A10	SYBR	1	Unkn	A3	29				A3	29	29.34	29.07
	A11	SYBR	1	Unkn	A3	28.51				A3	28.51	28.45	28.63
	A12	SYBR	1	Unkn	A3	29.13				A3	29.13	29.28	29.44
	B01	SYBR	2	Unkn	A3	29.64
	B02	SYBR	2	Unkn	A3	29.49
	B03	SYBR	3	Unkn	A3	38.95				A3	24.14	24.05	24.19		24.14	24.99	36.16	26.43	25.93	25.72	25.53	26.15	24.41	25.21	25.26	25.79
	B04	SYBR	4	Unkn	A3	29.23				A3	24.99	24.73	24.86		24.05	24.73	35.61	26.23	25.63	25.44	25.25	26.06	24.14	25.36	25.14	25.89
	B05	SYBR	5	Unkn	A3	29.98				A3	36.16	35.61	37.96		24.19	24.86	37.96	26.37	25.69	25.67	25.42	26.26	24.39	25.2	25.06	26.04
	B06	SYBR	6	Unkn	A3	28.44				A3	26.43	26.23	26.37
	B07	SYBR	7	Unkn	A3	29.07				A3	25.93	25.63	25.69
	B08	SYBR	8	Unkn	A3	29.31				A3	25.72	25.44	25.67
	B09	SYBR	2	Unkn	A3	28.42				A3	25.53	25.25	25.42
	B10	SYBR	2	Unkn	A3	29.34				A3	26.15	26.06	26.26
	B11	SYBR	2	Unkn	A3	28.45				A3	24.41	24.14	24.39
	B12	SYBR	2	Unkn	A3	29.28				A3	25.21	25.36	25.2
	C01	SYBR	2	Unkn	A3	29.61				A3	25.26	25.14	25.06
	C02	SYBR	2	Unkn	A3	29.29				A3	25.79	25.89	26.04
	C03	SYBR	3	Unkn	A3	39.23
	C04	SYBR	4	Unkn	A3	29.03
	C05	SYBR	5	Unkn	A3	30.43				UBQ	20.63	20.77	20.7		20.63	20.62	31.33	21.07	21.3	20.8	20.21	20.76	20.1	21.05	20.48	20.73
	C06	SYBR	6	Unkn	A3	27.69				UBQ	20.62	20.79	20.7		20.77	20.79	32.89	21.25	21.38	21.24	20.46	21.07	19.99	21.16	20.7	21.55
	C07	SYBR	7	Unkn	A3	29.08				UBQ	31.33	32.89			20.7	20.7		21.15	21.35	21	20.3	20.9	20	21.1	20.6	21
	C08	SYBR	8	Unkn	A3	29.09				UBQ	21.07	21.25	21.15
	C09	SYBR	3	Unkn	A3	28.45				UBQ	21.3	21.38	21.35
	C10	SYBR	3	Unkn	A3	29.07				UBQ	20.8	21.24	21
	C11	SYBR	3	Unkn	A3	28.63				UBQ	20.21	20.46	20.3
	C12	SYBR	3	Unkn	A3	29.44				UBQ	20.76	21.07	20.9
	D01	SYBR	2	Unkn	A3	24.14				UBQ	20.1	19.99	20
	D02	SYBR	2	Unkn	A3	24.99				UBQ	21.05	21.16	21.1
	D03	SYBR	3	Unkn	A3	36.16				UBQ	20.48	20.7	20.6
	D04	SYBR	4	Unkn	A3	26.43				UBQ	20.73	21.55	21
	D05	SYBR	5	Unkn	A3	25.93
	D06	SYBR	6	Unkn	A3	25.72
	D07	SYBR	7	Unkn	A3	25.53
	D08	SYBR	8	Unkn	A3	26.15
	D09	SYBR	4	Unkn	A3	24.41
	D10	SYBR	4	Unkn	A3	25.21
	D11	SYBR	4	Unkn	A3	25.26
	D12	SYBR	4	Unkn	A3	25.79
	E01	SYBR	2	Unkn	A3	24.05
	E02	SYBR	2	Unkn	A3	24.73
	E03	SYBR	3	Unkn	A3	35.61
	E04	SYBR	4	Unkn	A3	26.23
	E05	SYBR	5	Unkn	A3	25.63
	E06	SYBR	6	Unkn	A3	25.44
	E07	SYBR	7	Unkn	A3	25.25
	E08	SYBR	8	Unkn	A3	26.06
	E09	SYBR	5	Unkn	A3	24.14
	E10	SYBR	5	Unkn	A3	25.36
	E11	SYBR	5	Unkn	A3	25.14
	E12	SYBR	5	Unkn	A3	25.89
	F01	SYBR	2	Unkn	A3	24.19
	F02	SYBR	2	Unkn	A3	24.86
	F03	SYBR	3	Unkn	A3	37.96
	F04	SYBR	4	Unkn	A3	26.37
	F05	SYBR	5	Unkn	A3	25.69
	F06	SYBR	6	Unkn	A3	25.67
	F07	SYBR	7	Unkn	A3	25.42
	F08	SYBR	8	Unkn	A3	26.26
	F09	SYBR	6	Unkn	A3	24.39
	F10	SYBR	6	Unkn	A3	25.2
	F11	SYBR	6	Unkn	A3	25.06
	F12	SYBR	6	Unkn	A3	26.04
	G01	SYBR	2	Unkn	UBQ	20.63
	G02	SYBR	2	Unkn	UBQ	20.62
	G03	SYBR	3	Unkn	UBQ	31.33
	G04	SYBR	4	Unkn	UBQ	21.07
	G05	SYBR	5	Unkn	UBQ	21.3
	G06	SYBR	6	Unkn	UBQ	20.8
	G07	SYBR	7	Unkn	UBQ	20.21
	G08	SYBR	8	Unkn	UBQ	20.76
	G09	SYBR	7	Unkn	UBQ	20.1
	G10	SYBR	7	Unkn	UBQ	21.05
	G11	SYBR	7	Unkn	UBQ	20.48
	G12	SYBR	7	Unkn	UBQ	20.73
	H01	SYBR	2	Unkn	UBQ	20.77
	H02	SYBR	2	Unkn	UBQ	20.79
	H03	SYBR	3	Unkn	UBQ	32.89
	H04	SYBR	4	Unkn	UBQ	21.25
	H05	SYBR	5	Unkn	UBQ	21.38
	H06	SYBR	6	Unkn	UBQ	21.24
	H07	SYBR	7	Unkn	UBQ	20.46
	H08	SYBR	8	Unkn	UBQ	21.07
	H09	SYBR	8	Unkn	UBQ	19.99
	H10	SYBR	8	Unkn	UBQ	21.16
	H11	SYBR	8	Unkn	UBQ	20.7
	H12	SYBR	8	Unkn	UBQ	21.55
